# Supplementary figures and images for: BDNF-producing, amyloid β-specific CD4 T cells as targeted drug-delivery vehicles in Alzheimer's disease
Source: PubMed Central journal article supplement — eBioMedicine. 2019 May 11;43:424–34. doi: 10.1016/j.ebiom.2019.04.019 (PMC6557914; doi:10.1016/j.ebiom.2019.04.019), 2019-05-11

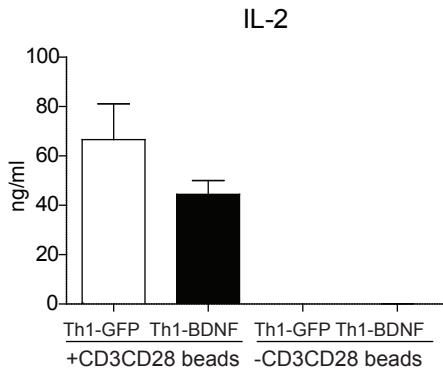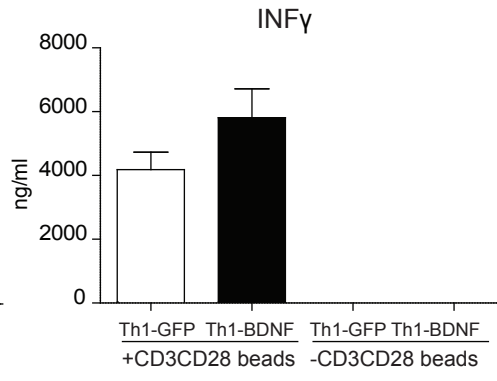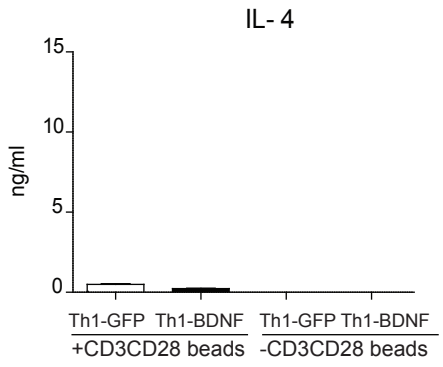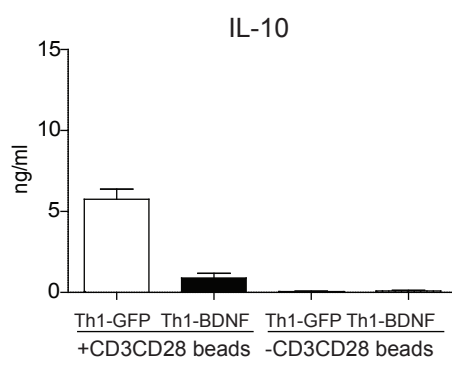

Supplement: mmc1.pdf [file mmc1.pdf]

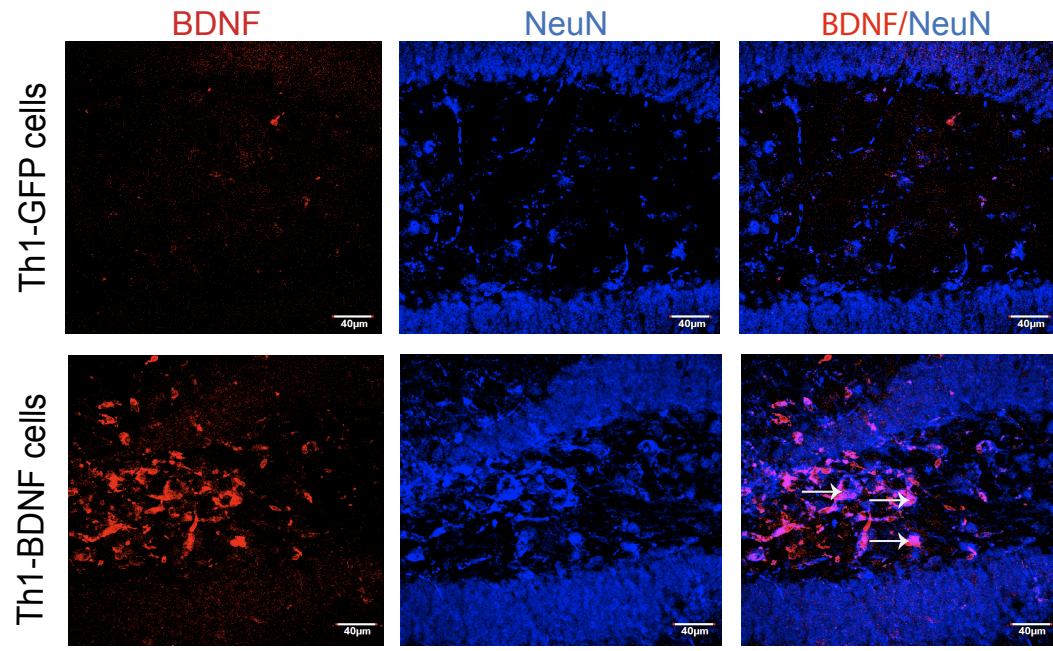

Supplement: mmc2.pdf [file mmc2.pdf]
